# Supplementary material
Source: PubMed Central journal article supplement (PMC7159083)
Supplement: mmc1.pdf [file mmc1.pdf]

Correspondence to:  
Dr Nicholas Banatvala  
nick.banatvala@dh.gsi.gov.uk

## Health is global: proposals for a UK Government-wide strategy

|                                                                                                                                                 | Strategy or framework                                                                                                 | Year of publication | Key points                                                                                                                                                                                                                                                                                                                                                                                                                                                                                       | Web link                                                                                                                                                                                                                                                                                    |
|-------------------------------------------------------------------------------------------------------------------------------------------------|-----------------------------------------------------------------------------------------------------------------------|---------------------|--------------------------------------------------------------------------------------------------------------------------------------------------------------------------------------------------------------------------------------------------------------------------------------------------------------------------------------------------------------------------------------------------------------------------------------------------------------------------------------------------|---------------------------------------------------------------------------------------------------------------------------------------------------------------------------------------------------------------------------------------------------------------------------------------------|
| Foreign and Commonwealth Office                                                                                                                 | Active Diplomacy for a Changing World                                                                                 | 2006                | Making world safer from global terrorism and weapons of mass destruction; reducing harm to UK from international crime, including drug trafficking, people smuggling, and money laundering; preventing and resolving conflict through a strong international system; promoting sustainable development and poverty reduction underpinned by human rights, democracy, good governance, and protection of environment; ensuring the security and good governance of the UK's overseas territories. | <a href="http://www.fco.gov.uk/Files/kfile/fullintpriorities2006.pdf">http://www.fco.gov.uk/Files/kfile/fullintpriorities2006.pdf</a>                                                                                                                                                       |
| Office of Science and Innovation                                                                                                                | The Foresight Project, Infectious Diseases: Preparing for the Future                                                  | 2006                | Threats of infectious diseases today and in future. Consideration of potential response: by developing systems to detect and identify and monitor new and emerging infections. Report describes key choices for policymakers in UK, Europe, and rest of world.                                                                                                                                                                                                                                   | <a href="http://www.foresight.gov.uk/Previous_Projects/Detection_and_Identification_of_Infectious_Diseases/Index.htm">http://www.foresight.gov.uk/Previous_Projects/Detection_and_Identification_of_Infectious_Diseases/Index.htm</a>                                                       |
| Department for International Development                                                                                                        | Eliminating World Poverty: Making Governance work for the poor                                                        | 2006                | Outlines approach to building effective states and better governance, supporting good governance internationally, promoting peace and security, reducing poverty through economic growth, investing in people, managing climate change, and reforming international development system                                                                                                                                                                                                           | <a href="http://www.dfid.gov.uk/wp2006/default.asp">http://www.dfid.gov.uk/wp2006/default.asp</a>                                                                                                                                                                                           |
| Department for Environment, Food and Rural Affairs                                                                                              | Securing the Future—The UK Government Sustainable Development Strategy                                                | 2005                | Principles and priorities for sustainable development agreed across the UK: sustainable consumption and production; climate change and energy; natural resource protection and environmental enhancement; and sustainable communities                                                                                                                                                                                                                                                            | <a href="http://www.sustainable-development.gov.uk/publications/pdf/strategy/SecFut_complete.pdf">http://www.sustainable-development.gov.uk/publications/pdf/strategy/SecFut_complete.pdf</a>                                                                                               |
| Department of Health, Department for Trade and Industry, Foreign and Commonwealth Office, Her Majesty's Treasury, Inland Revenue, Patent Office | Increasing access to essential medicines in developing countries: UK Government policy and plans                      | 2004                | Describes scale of problem and role of essential medicines in addressing ill health in developing countries. Summarises UK Government objectives and plans in this area and role of industry and development partners.                                                                                                                                                                                                                                                                           | <a href="http://www.dfid.gov.uk/pubs/files/accessmedicines.pdf">http://www.dfid.gov.uk/pubs/files/accessmedicines.pdf</a>                                                                                                                                                                   |
| Department for Education and Skills                                                                                                             | Putting the World into World-Class Education, An international Strategy for Education, Skills and Children's Services | 2004                | Highlights need to instil global dimension into learning experience of all children and young people. Emphasises that all who live in a global society need understanding of certain concepts, including those of social justice, as an element in both sustainable development and improved welfare of all people.                                                                                                                                                                              | <a href="http://www.globalgateway.org.uk/PDF/International-Strategy.pdf">http://www.globalgateway.org.uk/PDF/International-Strategy.pdf</a>                                                                                                                                                 |
| Government-Industry                                                                                                                             | Healthcare Industries Task Force                                                                                      | 2004                | Identifies several priority countries on which UK Trade and Investment should concentrate its strategic activities and resources for the British health-care industry.                                                                                                                                                                                                                                                                                                                           | <a href="http://www.abhi.org.uk/patients/htif/default.aspx">http://www.abhi.org.uk/patients/htif/default.aspx</a>                                                                                                                                                                           |
| Department for International Development, Foreign and Commonwealth Office, Ministry of Defence                                                  | Post-Conflict Reconstruction Unit                                                                                     | 2004                | Aims to improve UK's response in post-conflict environments. UK's expertise in public health has potential to contribute to this response.                                                                                                                                                                                                                                                                                                                                                       | <a href="http://www.postconflict.gov.uk/">http://www.postconflict.gov.uk/</a>                                                                                                                                                                                                               |
| Department for International Development, Foreign and Commonwealth Office, Ministry of Defence                                                  | Africa Conflict Prevention Pool                                                                                       | 2004                | Joint UK Government approach to preventing and reducing conflict in sub-Saharan Africa                                                                                                                                                                                                                                                                                                                                                                                                           | <a href="http://www.dfid.gov.uk/pubs/files/acppinfodoc.pdf">http://www.dfid.gov.uk/pubs/files/acppinfodoc.pdf</a>                                                                                                                                                                           |
| Department for International Development, Foreign and Commonwealth Office, Ministry of Defence                                                  | Global Conflict Prevention Pool                                                                                       | 2003                | Joint UK government approach to reducing conflict                                                                                                                                                                                                                                                                                                                                                                                                                                                | <a href="http://www.dfid.gov.uk/pubs/files/global-conflict-prevention-pool.pdf">http://www.dfid.gov.uk/pubs/files/global-conflict-prevention-pool.pdf</a>                                                                                                                                   |
| Department of Health                                                                                                                            | International Humanitarian and Health Work – Toolkit to Support Good Practice                                         | 2003                | Describes contribution that NHS and its staff can make to international relief. Describes best practice on how individuals and organisations can undertake this work.                                                                                                                                                                                                                                                                                                                            | <a href="http://www.fph.org.uk/policy_communication/downloads/international_public_health/international_humanitarian_and_healthwork_toolkit.pdf">http://www.fph.org.uk/policy_communication/downloads/international_public_health/international_humanitarian_and_healthwork_toolkit.pdf</a> |
| Department of Health                                                                                                                            | Getting Ahead of the Curve                                                                                            | 2002                | Strategy for combating infectious diseases. Draws attention to importance of preventing and controlling infectious disease in England being set in global context.                                                                                                                                                                                                                                                                                                                               | <a href="http://www.dh.gov.uk/assetRoot/04/06/03/38/04060338.pdf">http://www.dh.gov.uk/assetRoot/04/06/03/38/04060338.pdf</a>                                                                                                                                                               |
| Department for International Development                                                                                                        | Eliminating World Poverty: Making globalisation work for the poor                                                     | 2000                | Describes how to draw poor countries into global economy. Outlines approach to tackle conflict and corruption, boost investment in human development, spread technology and research, reduce barriers to trade, tackle environmental issues, make development more effective                                                                                                                                                                                                                     | <a href="http://www.dfid.gov.uk/pubs/files/whitepaper2000.pdf">http://www.dfid.gov.uk/pubs/files/whitepaper2000.pdf</a>                                                                                                                                                                     |
| Department for International Development                                                                                                        | Eliminating World Poverty: A challenge for the 21st century                                                           | 1997                | Describes UK Government's commitment to poverty eradication as central pillar of international development efforts                                                                                                                                                                                                                                                                                                                                                                               | <a href="http://www.dfid.gov.uk/pubs/files/whitepaper1997.pdf">http://www.dfid.gov.uk/pubs/files/whitepaper1997.pdf</a>                                                                                                                                                                     |

**Webtable:** Examples of UK strategies and initiatives that effect global health, by Government department
